# Supplementary material for: Eucommia ulmoides male flower as a remarkable edible floral resource exerts lifespan/healthspan-promoting effects on Caenorhabditis elegans
Source: Royal Society of Chemistry journal article supplement (doi:10.1039/d2fo03006c), 2022-12-07
Supplement: d2fo03006c1.pdf [file d2fo03006c1.pdf]

### **Supplementary materials**

The supplementary file containing Supplementary eTables 1-10, Supplementary eMethods 1-7, Supplementary eFigures 1-8, and Reference are provided.

#### **Supplementary eTables:**

- eTable 1. Supporting information of 30 common edible flowers.
- eTable 2. List of the *C.elegans* strains used in this study.
- eTable 3. List of the primers used in this study for qPCR analysis.
- eTable 4. Summary of the wild-type *C.elegans* lifespan experiments treated with ethanolic extracts of 30 edible flowers.
- eTable 5. *In vitro* antioxidant properties of 30 common edible floral extracts.
- eTable 6. Correlations between edible flowers' antioxidant potency composite index (APCI) and effects on nematode mean and median lifespan.
- eTable 7. Summary of the *C.elegans* lifespan experiments treated with EUFE or active components.
- eTable 8. Determination of total phenolic, flavonoid, and terpenoid contents in 12 edible flowers with lifespan-promoting effects.
- eTable 9. Correlations among 12 edible flowers' total phenolic, flavonoid, and terpenoid contents and effects on nematode mean lifespan.
- eTable 10. Chemical constituents qualitatively identified from EUFE by UHPLC-QE-MS.

#### **Supplementary eMethods:**

- eMethod 1. The specific preparation process of floral ethanolic extracts and EUFE.
- eMethod 2. The specific process of synchronization and administration in *C.elegans*.
- eMethod 3. The detailed calculation of the antioxidant potency composite index (APCI).
- eMethod 4. The detailed procedures of diet preference assay.
- eMethod 5. The detailed procedures of microscopic fluorescence imaging.
- eMethod 6. The detailed procedures of transmission electron microscopy.
- eMethod 7. The specific procedures of qualitative and quantitative analysis of EUFE.

#### **Supplementary eFigures:**

- eFigure 1. The scheme and results of diet preference assay in *C.elegans*.
- eFigure 2. Effects of ethanolic extracts of 18 edible flowers on *C.elegans* lifespan.
- eFigure 3. The survival rate of wild-type nematodes cultured on NGM plates containing 0.5, 1, 5, or 10 mg/mL EUFE or vehicle in 1 d and 7 d.
- eFigure 4. The body size (for 1 day) of nematodes treated with EUFE and vehicle.
- eFigure 5. The reproductive ability of nematodes treated with EUFE and vehicle.
- eFigure 6. Representative images of muscle morphology at days 1 of adulthood of *pmyo-3MYO-3::GFP* nematodes treated with EUFE or vehicle.
- eFigure 7. Representative images of muscle morphology at days 5 of adulthood of *pmyo-3MYO-3::GFP* nematodes treated with EUFE or vehicle.
- eFigure 8. Relative mRNA expression of *daf-16* gene in worms after treatment of vehicle or five identified compounds for 1 d.

#### **Reference**

**eTable 1. Supporting information of 30 common edible flowers.**

| Number | Scientific name                                 | Common name                             | Botanical family | Coloration                                                                                                                                  | Edible part         |
|--------|-------------------------------------------------|-----------------------------------------|------------------|---------------------------------------------------------------------------------------------------------------------------------------------|---------------------|
| 1      | <i>Hibiscus sabdariffa</i> L.                   | Roselle                                 | Malvaceae        | Red<br><br>Source: by Hazel Chiang                        | Calyces             |
| 2      | <i>Eucommia ulmoides</i> Oliver.                | Male flower of <i>Eucommia ulmoides</i> | Eucommiaceae     | Green<br><br>Source: by Paco Garin                        | Male flower         |
| 3      | <i>Carthamus tinctorius</i> L.                  | Safflower                               | Asteraceae       | Orange red<br><br>Source: by Krzysztof Kozłowski         | Tubular flower      |
| 4      | <i>Erigeron breviscapus</i> (Vant.) Hand.-Mazz. | Fleabane flower                         | Asteraceae       | Blue or pinkish purple<br><br>Source: by Colleen Prieto | Flower              |
| 5      | <i>Citrus aurantium</i> L.                      | Bitter/sour orange flower               | Rutaceae         | White<br><br>Source: by Sebastiao Pereira-Nunes         | Petal or flower bud |
| 6      | <i>Dendrobium candidum</i> Kimura et Migo.      | Flower of <i>Dendrobium officinale</i>  | Orchidaceae      | Yellow<br><br>Source: by Naoki Takebayashi              | Flower              |

| Number | Scientific name                            | Common name                                                      | Botanical family | Coloration                                                                                                                                                         | Edible part          |
|--------|--------------------------------------------|------------------------------------------------------------------|------------------|--------------------------------------------------------------------------------------------------------------------------------------------------------------------|----------------------|
| 7      | <i>Lonicera japonica</i> Thunb.            | Japanese honeysuckle, Golden and silver honeysuckle, Jin Yin Hua | Caprifoliaceae   | White, yellow-green<br><br>Source: by Unni Henning                               | Flower or flower bud |
| 8      | <i>Tagetes erecta</i> L.                   | African marigold, Aztec marigold                                 | Asteraceae       | Bright yellow, brownish yellow, orange to brown<br><br>Source: by Stephen Nelson | Corolla or flower    |
| 9      | <i>Nelumbo nucifera</i> Gaertn.            | Sacred water lotus                                               | Nelumbonaceae    | Red, pink or white<br><br>Source: by Ebroh                                      | Petal or flower bud  |
| 10     | <i>Eriobotrya japonica</i> (Thunb.) Lindl. | Loquat flower                                                    | Rosaceae         | Yellowish white<br><br>Source: by sante boschian pest                          | Flower               |
| 11     | <i>Trollius chinensis</i> Bunge.           | Nasturtium, Chinese globeflower                                  | Ranunculaceae    | Yellow, orange, red<br><br>Source: by Chien Hung                               | Flower               |
| 12     | <i>Nymphaea tetragona</i> Georgi.          | Water lily, pygmy Waterlily                                      | Nymphaeaceae     | Red, pink, yellow, purple or white<br><br>Source: by Ian Dunbar-Reid           | Petal or flower bud  |

| Number | Scientific name                        | Common name                      | Botanical family | Coloration                                                                                                                                           | Edible part         |
|--------|----------------------------------------|----------------------------------|------------------|------------------------------------------------------------------------------------------------------------------------------------------------------|---------------------|
| 13     | <i>Rosa rugosa</i><br>Thunb.           | Rugosa rose                      | Rosaceae         | White, purple, red, or pink<br><br>Source: by Andreas Rockstein    | Petal or flower bud |
| 14     | <i>Hemerocallis citrina</i><br>Baroni. | Daylily                          | Liliaceae        | Large yellow, red or orange<br><br>Source: by hmxxyy               | Flower bud          |
| 15     | <i>Dolichos lablab</i> L.              | Flower of <i>Dolichos lablab</i> | Leguminosae      | Yellowish white or yellowish brown<br><br>Source: by Dinesh Valke | Petal               |
| 16     | <i>Prunus × yedoensis</i><br>Matsum.   | Cherry blossom                   | Rosaceae         | White, pink<br><br>Source: by Dinesh Valke                       | Petal               |
| 17     | <i>Prunus persica</i>                  | Peach blossom                    | Rosaceae         | White, pink, red<br><br>Source: by John Freshney                 | Flower              |
| 18     | <i>Matricaria recutita</i>             | Chamomile                        | Asteraceae       | White and yellow<br><br>Source: by Mauricio Mercadante           | Flower              |

| Number | Scientific name                                         | Common name                                            | Botanical family | Coloration                                                                                                                                                  | Edible part                |
|--------|---------------------------------------------------------|--------------------------------------------------------|------------------|-------------------------------------------------------------------------------------------------------------------------------------------------------------|----------------------------|
| 19     | <i>Sophora japonica</i> L.                              | Flos<br>Sophorae<br>Immaturus,<br>Huai mi              | Fabaceae         | Yellow-white<br><br>Source: by Bart Omeu                                  | Flower or<br>flower<br>bud |
| 20     | <i>Rosa chinensis</i><br>Jacq.                          | Chinese<br>rose,<br>monthly<br>rose, rosa<br>chinensis | Rosaceae         | Red or pink<br><br>Source: by Ron Dilley                                  | Petal or<br>flower<br>bud  |
| 21     | <i>Chrysanthemum morifolium</i><br>Ramat.               | Florist's<br>daisy,<br>Hardy<br>garden<br>mum          | Asteraceae       | Yellow-white<br><br>Source: by Shihmei Barger                            | Corolla or<br>flower       |
| 22     | <i>Osmanthus fragrans</i><br>Lour.                      | Sweet-<br>scented<br>osmanthus,<br>Sweet olive         | Oleaceae         | White, pale yellow, yellow or<br>orange-yellow<br><br>Source: by Kamuyp | Four-<br>lobed<br>corolla  |
| 23     | <i>Michelia alba</i><br>DC.                             | White<br>champaca                                      | Magnoliaceae     | White<br><br>Source: by yvone042488                                     | Petal                      |
| 24     | <i>Lilium brownii</i> var.<br><i>viridulum</i><br>Baker | Lily                                                   | Liliaceae        | White, yellow, pink or red<br><br>Source: by David Fenn                 | Petal                      |

| Number | Scientific name                                                                        | Common name             | Botanical family | Coloration                                                                                                                                           | Edible part         |
|--------|----------------------------------------------------------------------------------------|-------------------------|------------------|------------------------------------------------------------------------------------------------------------------------------------------------------|---------------------|
| 25     | <i>Calendula officinalis</i> L.                                                        | Pot marigold            | Asteraceae       | Yellow or orange<br><br>Source: by Anna Muratore                   | Corolla or flower   |
| 26     | <i>Crocus sativus</i> L.                                                               | Saffron, Fan Hong Hua   | Iridaceae        | Light blue, red purple or white<br><br>Source: by Jindrich Shejbal | Stigmata of flower  |
| 27     | <i>Armeniaca mume</i> Sieb. var. <i>mume</i> f. <i>viridicalyx</i> (Makino) T. Y. Chen | Flosumume               | Rosaceae         | White<br><br>Source: by Crystal LIU                               | Flower bud          |
| 28     | <i>Paeonia suffruticosa</i> Andr.                                                      | Tree peony              | Ranunculaceae    | Rose, mauve, pink or white<br><br>Source: by kesha poole         | Petal               |
| 29     | <i>Jasminum sambac</i> (L.) Aiton                                                      | Jasmine                 | Oleaceae         | White<br><br>Source: by Anna Muratore                            | Petal or flower bud |
| 30     | <i>Camellia sinensis</i> (Linn.) O. Kuntze                                             | Tea blossom, tea flower | Theaceae         | White<br><br>Source: by Jindrich Shejbal                         | Petal or flower bud |

All images of flowers are sourced from [www.flickr.com](http://www.flickr.com)

**eTable 2. List of the *C.elegans* strains used in this study.**

| <b>Strain name</b> | <b>Genotype</b>                                                            |
|--------------------|----------------------------------------------------------------------------|
| N2                 | Wild-type Bristol                                                          |
| IR1511             | N2;Ex001[p <sub>myo-3</sub> DsRed::LGG-1;p <sub>dct-1</sub> DCT-1::GFP]    |
| CF1553             | mul84 [(pAD76) <i>sod-3p</i> ::GFP + <i>rol-6</i> (su1006)]                |
| DA2123             | adls2122 [ <i>igg-1p</i> ::GFP:: <i>igg-1</i> + <i>rol-6</i> (su1006)]     |
| TJ356              | zls356 [ <i>daf-16p</i> :: <i>daf-16a/b</i> ::GFP + <i>rol-6</i> (su1006)] |
| RW1596             | stEx30 [ <i>myo-3p</i> ::GFP:: <i>myo-3</i> + <i>rol-6</i> (su1006)]       |
| SJ4103             | zcls14 [ <i>myo-3</i> ::GFP(mit)]                                          |
| CF1038             | <i>daf-16</i> ( <i>mu86</i> ) I.                                           |
| DA465              | <i>eat-2</i> ( <i>ad465</i> ) II.                                          |
| TJ1052             | <i>age-1</i> ( <i>hx546</i> ) II.                                          |
| TK22               | <i>mev-1</i> ( <i>kn1</i> ) III.                                           |
| MQ130              | <i>clk-1</i> ( <i>qm30</i> ) III.                                          |
| GR2245             | <i>skn-1</i> ( <i>mg570</i> ) IV.                                          |

The information presented in this table is provided from Caenorhabditis Genetics Center.

**eTable 3. List of the primers used in this study for qPCR analysis.**

| Gene name       | Primer sequences        |                       |
|-----------------|-------------------------|-----------------------|
|                 | Forward                 | Reverse               |
| <i>act-1</i>    | CTACGAACTTCCTGACGGACAAG | CCGGCGGACTCCATACC     |
| <i>daf-16</i>   | GAGGAGCACAGCTTCCAGAAT   | ATTGAGCTCCGCCTCCAATG  |
| <i>sir-2.1</i>  | CGATGCACCCGAAACAAACA    | TTCTGCCTTACAGGAGCACG  |
| <i>sod-3</i>    | GCAATCTACTGCTCGCACTG    | TTCGAAACAGCCTCGTGAAGT |
| <i>skn-1</i>    | TCAACCGTCCAATGGGTCTC    | GTGCCCTTCTCTCCAGCAAT  |
| <i>hsp-16.2</i> | GGAACGCCAATTTGCTCCAG    | AGATTCTGAAGCAACTGCACC |
| <i>drp-1</i>    | AGCCCACCAATGAGCTTGTC    | GAGCACTGACCGCTCTTTCT  |
| <i>eat-3</i>    | TGATGCGTTTAGAGCAGCCA    | TGAAGAAGCATAACGCAGGCA |
| <i>lgg-1</i>    | CGTGCCGAAGGAGACAAGAT    | CTTCCTCGTGATGGTCCTGG  |
| <i>dct-1</i>    | TGGTATGTCAGAATCGTGGGTG  | ACGGACAGTCTTTGGAGGTG  |
| <i>hsp-6</i>    | ACAGGCCGTTACCAACTCTG    | TGTTGACGGTGGTTCCCAA   |
| <i>nhr-65</i>   | TGGACGAAATGCTTGGCTTG    | ACGTTGAAAAGCTCCGCGAT  |
| <i>mev-1</i>    | CGCAGTTTTGCCGTTTCGATT   | AGAAGGCGGAGCATCTGTG   |



**eTable 4. Summary of the wild-type *C.elegans* lifespan experiments treated with ethanolic extracts of 30 edible flowers.**

| Treatment (vehicle <sup>a</sup> and flower species <sup>b</sup> ) | Mean lifespan ± SEM (days) | Percentage change (%) | Median lifespan (days) | Percentage change (%) | No. death/ censored (no. trial ) | <i>P</i> -value against vehicle |
|-------------------------------------------------------------------|----------------------------|-----------------------|------------------------|-----------------------|----------------------------------|---------------------------------|
| <i>Vehicle control</i>                                            | 15.80 ± 0.28               | /                     | 16.00                  | /                     | 354/36 (3)                       | /                               |
| 1 <i>H. sabdariffa</i> flower                                     | 17.80 ± 0.19               | 12.66                 | 18.50                  | 15.63                 | 384/36 (3)                       | < 0.0001                        |
| 2 <i>E. ulmoides</i> male flower                                  | 17.79 ± 0.31               | 12.59                 | 19.00                  | 15.79                 | 372/48 (3)                       | < 0.0001                        |
| 3 <i>C. tinctorius</i> flower                                     | 17.73 ± 0.25               | 12.22                 | 18.00                  | 12.50                 | 360/60 (3)                       | < 0.0001                        |
| 4 <i>E. breviscapus</i> flower                                    | 17.45 ± 0.19               | 10.44                 | 18.00                  | 12.50                 | 306/84 (3)                       | 0.0012                          |
| 5 <i>C. aurantium</i> flower                                      | 17.21 ± 0.21               | 8.92                  | 18.00                  | 12.50                 | 342/78 (3)                       | 0.0001                          |
| 6 <i>D. candidum</i> flower                                       | 17.10 ± 0.27               | 7.10                  | 18.00                  | 12.50                 | 354/66 (3)                       | 0.0016                          |
| 7 <i>L. japonica</i> flower                                       | 17.23 ± 0.45               | 9.05                  | 17.00                  | 6.25                  | 336/84 (3)                       | 0.0044                          |
| 8 <i>T. erecta</i> flower                                         | 17.15 ± 0.22               | 8.54                  | 17.00                  | 6.25                  | 408/72(3)                        | 0.0043                          |
| 9 <i>N. nucifera</i> flower                                       | 16.79 ± 0.21               | 6.27                  | 17.00                  | 6.25                  | 234/186 (3)                      | 0.0073                          |
| 10 <i>E. japonica</i> flower                                      | 16.70 ± 0.43               | 5.70                  | 18.00                  | 12.50                 | 444/36 (3)                       | 0.0012                          |
| 11 <i>T. chinensis</i> flower                                     | 16.52 ± 0.22               | 4.56                  | 17.00                  | 6.25                  | 324/96 (3)                       | 0.0159                          |
| 12 <i>N. tetragona</i> flower                                     | 16.48 ± 0.18               | 4.30                  | 17.00                  | 6.25                  | 378/42 (3)                       | 0.0474                          |
| 13 <i>R. rugosa</i> flower                                        | 16.25 ± 0.28               | 2.85                  | 17.00                  | 6.25                  | 360/60 (3)                       | 0.1038                          |
| 14 <i>H. citrina</i> flower                                       | 16.00 ± 0.21               | 1.27                  | 17.00                  | 6.25                  | 300/120 (3)                      | 0.0695                          |
| 15 <i>D. lablab</i> flower                                        | 15.83 ± 0.39               | 0.19                  | 17.00                  | 6.25                  | 426/54 (3)                       | 0.6673                          |
| 16 <i>P. × yedoensis</i> flower                                   | 16.91 ± 0.67               | 7.03                  | 16.00                  | 0.00                  | 330/90 (3)                       | 0.0120                          |
| 17 <i>P. persica</i> flower                                       | 16.07 ± 0.47               | 1.71                  | 16.00                  | 0.00                  | 276/144 (3)                      | 0.3792                          |
| 18 <i>M. recutita</i> flower                                      | 15.93 ± 0.28               | 0.82                  | 16.00                  | 0.00                  | 348/72 (3)                       | 0.0828                          |
| 19 <i>S. japonica</i> flower                                      | 15.58 ± 0.58               | -1.39                 | 16.00                  | 0.00                  | 438/42 (3)                       | 0.1812                          |
| 20 <i>R. chinensis</i> flower                                     | 15.43 ± 0.64               | -2.34                 | 16.00                  | 0.00                  | 282/138 (3)                      | 0.7868                          |
| 21 <i>C. morifolium</i> flower                                    | 15.86 ± 0.59               | 0.38                  | 15.50                  | -3.13                 | 444/396 (3)                      | 0.1932                          |
| 22 <i>O. fragrans</i> flower                                      | 15.38 ± 0.31               | -2.66                 | 15.50                  | -3.13                 | 300/120 (3)                      | 0.9081                          |
| 23 <i>M. alba</i> flower                                          | 15.29 ± 0.25               | -3.23                 | 15.00                  | -6.25                 | 390/30 (3)                       | 0.5237                          |
| 24 <i>L. brownii</i> flower                                       | 15.26 ± 0.27               | -3.42                 | 15.00                  | -6.25                 | 432/48 (3)                       | 0.9928                          |
| 25 <i>C. officinalis</i> flower                                   | 15.21 ± 0.22               | -3.73                 | 15.00                  | -6.25                 | 342/78 (3)                       | 0.4798                          |
| 26 <i>C. sativus</i> flower                                       | 14.66 ± 0.19               | -7.22                 | 15.00                  | -6.25                 | 264/156 (3)                      | 0.1388                          |
| 27 <i>A. mume</i> flower                                          | 15.02 ± 0.36               | -4.94                 | 15.00                  | -6.25                 | 438/42 (3)                       | 0.1037                          |
| 28 <i>P. suffruticosa</i> flower                                  | 13.96 ± 0.16               | -11.65                | 14.00                  | -12.50                | 276/144 (3)                      | 0.2153                          |
| 29 <i>J. sambac</i> flower                                        | 14.77 ± 0.28               | -6.52                 | 15.00                  | -6.25                 | 342/78 (3)                       | 0.0191                          |
| 30 <i>C. sinensis</i> flower                                      | 14.20 ± 0.22               | -10.13                | 14.00                  | -12.50                | 420/60 (3)                       | 0.0178                          |

<sup>a</sup> The vehicle control used is based on a sham ethanol extraction. <sup>b</sup> Flowers are numbered according to **eTable 1**.

The concentration of each floral extract is 50 mg/mL according to **eMethod 1**. N2 means *C. elegans* Bristol N2 strain wild-type nematodes. *P* values represent comparison with vehicle calculated using log-rank (Mantel-Cox) test by GraphPad Prism.

**eTable 5. *In vitro* antioxidant properties of 30 common edible floral extracts.**

| Flower species <sup>a</sup>      | Antioxidant assays <sup>b</sup>  |                                  |                                              | APCI <sup>c</sup> |
|----------------------------------|----------------------------------|----------------------------------|----------------------------------------------|-------------------|
|                                  | DPPH ( $\mu\text{mol Vc/g dw}$ ) | ABTS ( $\mu\text{mol Vc/g dw}$ ) | FRAP ( $\mu\text{mol Fe}^{2+}/\text{g dw}$ ) |                   |
| 1 <i>H. sabdariffa</i> flower    | 39.51 ± 2.25                     | 114.59 ± 1.86                    | 419.98 ± 7.39                                | 7.09±0.18         |
| 2 <i>E. ulmoides</i> male flower | 77.75 ± 11.77                    | 362.85 ± 7.78                    | 1,072.00 ± 40.71                             | 18.84±0.92        |
| 3 <i>C. tinctorius</i> flower    | 100.09 ± 6.58                    | 382.14 ± 20.09                   | 1,065.01 ± 11.63                             | 20.10±0.80        |
| 4 <i>E. breviscapus</i> flower   | 163.28 ± 5.12                    | 529.67 ± 11.89                   | 1,559.02 ± 66.97                             | 29.39±0.94        |
| 5 <i>C. aurantium</i> flower     | 66.12 ± 3.46                     | 806.57 ± 12.57                   | 768.06 ± 27.08                               | 26.53±0.61        |
| 6 <i>D. candidum</i> flower      | 14.36 ± 0.77                     | 84.26 ± 2.45                     | 156.65 ± 3.75                                | 3.59±0.11         |
| 7 <i>L. japonica</i> flower      | 91.55 ± 4.98                     | 206.90 ± 1.04                    | 827.49 ± 10.66                               | 14.07±0.29        |
| 8 <i>T. erecta</i> flower        | 377.02 ± 7.67                    | 818.68 ± 7.90                    | 3,108.23 ± 36.77                             | 55.11±0.74        |
| 9 <i>N. nucifera</i> flower      | 360.16 ± 13.22                   | 814.06 ± 9.32                    | 2,190.62 ± 50.71                             | 47.99±1.08        |
| 10 <i>E. japonica</i> flower     | 25.18 ± 2.02                     | 68.10 ± 0.85                     | 199.10 ± 4.63                                | 3.93±0.13         |
| 11 <i>T. chinensis</i> flower    | 206.89 ± 7.48                    | 532.48 ± 6.67                    | 1,453.16 ± 23.03                             | 30.41±0.60        |
| 12 <i>N. tetragona</i> flower    | 484.20 ± 13.17                   | 1,056.35 ± 39.44                 | 3,649.24 ± 76.88                             | 68.52±1.96        |
| 13 <i>R. rugosa</i> flower       | 317.12 ± 8.44                    | 559.39 ± 39.88                   | 2,358.81 ± 69.03                             | 41.60±1.73        |
| 14 <i>H. citrina</i> flower      | 8.03 ± 1.00                      | 53.84 ± 1.47                     | 131.69 ± 4.23                                | 2.47±0.10         |
| 15 <i>D. lablab</i> flower       | 10.85 ± 1.10                     | 66.44 ± 1.28                     | 125.75 ± 3.17                                | 2.83±0.09         |
| 16 <i>P. × yedoensis</i> flower  | 113.39 ± 0.86                    | 309.18 ± 4.87                    | 955.30 ± 25.84                               | 18.17±0.33        |
| 17 <i>P. persica</i> flower      | 24.97 ± 0.97                     | 105.82 ± 0.47                    | 254.15 ± 6.90                                | 5.18±0.10         |
| 18 <i>M. recutita</i> flower     | 126.14 ± 9.65                    | 419.05 ± 18.33                   | 1,693.53 ± 31.08                             | 26.32±1.01        |
| 19 <i>S. japonica</i> flower     | 22.02 ± 2.45                     | 134.57 ± 2.66                    | 245.34 ± 7.23                                | 5.67±0.21         |
| 20 <i>R. chinensis</i> flower    | 278.46 ± 8.05                    | 569.03 ± 14.17                   | 1,947.33 ± 46.88                             | 37.47±0.97        |
| 21 <i>C. morifolium</i> flower   | 79.19 ± 10.63                    | 200.61 ± 4.45                    | 751.21 ± 14.13                               | 12.92±0.61        |
| 22 <i>O. fragrans</i> flower     | 192.19 ± 7.65                    | 669.28 ± 9.75                    | 1,767.19 ± 29.77                             | 35.18±0.73        |
| 23 <i>M. alba</i> flower         | 39.11 ± 1.32                     | 121.61 ± 1.79                    | 402.14 ± 6.14                                | 7.12±0.14         |
| 24 <i>L. brownii</i> flower      | 18.20 ± 2.20                     | 57.63 ± 2.00                     | 202.76 ± 13.28                               | 3.44±0.22         |
| 25 <i>C. officinalis</i> flower  | 28.66 ± 6.00                     | 169.93 ± 8.71                    | 512.99 ± 14.78                               | 8.60±0.54         |
| 26 <i>C. sativus</i> flower      | 15.16 ± 0.61                     | 90.86 ± 3.91                     | 285.65 ± 9.99                                | 4.67±0.18         |
| 27 <i>A. mume</i> flower         | 258.67 ± 8.42                    | 755.84 ± 5.27                    | 2,539.31 ± 55.63                             | 45.12±0.83        |
| 28 <i>P. suffruticosa</i> flower | 836.56 ± 13.20                   | 1,403.44 ± 32.29                 | 4,409.24 ± 262.76                            | 95.49±3.08        |
| 29 <i>J. sambac</i> flower       | 28.49 ± 3.15                     | 129.07 ± 4.56                    | 341.11 ± 10.49                               | 6.45±0.30         |
| 30 <i>C. sinensis</i> flower     | 368.70 ± 8.96                    | 678.79 ± 10.68                   | 2,133.15 ± 52.04                             | 44.80±0.96        |

<sup>a</sup> Flowers are abbreviated and numbered according to eTable 1. <sup>b</sup> DPPH, free radical scavenging properties by 2, 2-diphenyl-1-picrylhydrazyl radical; ABTS, free radical scavenging activities against ABTS radical cations (2,2'-Azino-bis(3-ethylbenzothiazoline-6-sulfonic acid); FRAP, ferric reducing antioxidant power; <sup>c</sup> APCI, antioxidant potency composite index.

**eTable 6. Correlations between edible flowers' antioxidant potency composite index (APCI) and effects on nematode mean and median lifespan.**

|                 | APCI  | mean lifespan       | median lifespan |
|-----------------|-------|---------------------|-----------------|
| APCI            | 1     | /                   | /               |
| mean lifespan   | -0.20 | 1                   | /               |
| median lifespan | -0.20 | 0.93 <sup>***</sup> | 1               |

\*\*\* Correlation is significant at the 0.001 level.

**eTable 7. Summary of the *C.elegans* lifespan experiments treated with EUFE or active components.**

| Strains             | Treatment               | Mean lifespan<br>± SEM (days) | Percentage<br>change (%) | Median<br>lifespan<br>(days) | No. death/<br>censored<br>(no. trial ) | <i>P</i> -value<br>against<br>control <sup>a</sup> |        |
|---------------------|-------------------------|-------------------------------|--------------------------|------------------------------|----------------------------------------|----------------------------------------------------|--------|
| N2                  | Day 0: Control          | 15.96 ± 0.37                  | /                        | 16.00                        | 342/48 (3)                             | /                                                  |        |
|                     | EUFE-25 µg/mL           | 17.12 ± 0.46                  | 7.27                     | 17.00                        | 510/75 (3)                             | 0.0159                                             |        |
|                     | EUFE-50 µg/mL           | 17.97 ± 0.37                  | 12.59                    | 18.00                        | 528/57 (3)                             | <0.0001                                            |        |
|                     | EUFE-100 µg/mL          | 18.93 ± 0.24                  | 18.61                    | 19.00                        | 408/177 (3)                            | <0.0001                                            |        |
|                     | EUFE-200 µg/mL          | 17.81 ± 0.22                  | 11.59                    | 18.00                        | 510/75(3)                              | <0.0001                                            |        |
|                     | EUFE-500 µg/mL          | 16.78 ± 0.69                  | 5.14                     | 17.00                        | 498/87 (3)                             | 0.1154                                             |        |
| <i>daf-16(mu86)</i> | Day 5: EUFE-100 µg/mL   | 18.10 ± 0.21                  | 13.41                    | 18.00                        | 486/54 (3)                             | <0.0001                                            |        |
|                     | Day 9: EUFE-100 µg/mL   | 17.36 ± 0.39                  | 8.77                     | 17.00                        | 480/60 (3)                             | 0.0009                                             |        |
| I.                  | Control                 | 13.64 ± 0.37                  | /                        | 14.00                        | 522/63 (3)                             | /                                                  |        |
|                     | EUFE-100 µg/mL          | 13.84 ± 0.12                  | 1.48                     | 14.00                        | 504/81(3)                              | 0.5732                                             |        |
|                     | Aucubin-100 µM          | 13.78 ± 0.28                  | 1.07                     | 14.00                        | 540/45 (3)                             | 0.5657                                             |        |
|                     | Geniposide-100 µM       | 14.07 ± 0.33                  | 3.18                     | 14.00                        | 504/81 (3)                             | 0.2727                                             |        |
|                     | Geniposidic acid-100 µM | 15.60 ± 0.37                  | 14.41                    | 16.00                        | 477/108 (3)                            | 0.0003                                             |        |
|                     | Asperuloside-100 µM     | 13.88 ± 0.21                  | 1.74                     | 14.00                        | 504/81 (3)                             | 0.4773                                             |        |
| <i>mev-1(kn1)</i>   | Chlorogenic acid-100 µM | 13.76 ± 0.43                  | 0.92                     | 14.00                        | 495/90 (3)                             | 0.7000                                             |        |
|                     | Control                 | 11.57 ± 0.49                  | /                        | 11.00                        | 522/63 (3)                             | /                                                  |        |
|                     | EUFE-100 µg/mL          | 11.89 ± 0.46                  | 2.77                     | 11.00                        | 486/99 (3)                             | 0.5620                                             |        |
|                     | Aucubin-100 µM          | 11.87 ± 0.28                  | 2.61                     | 11.50                        | 486/99 (3)                             | 0.5252                                             |        |
|                     | Geniposide-100 µM       | 11.85 ± 0.24                  | 2.43                     | 12.00                        | 540/45 (3)                             | 0.4385                                             |        |
|                     | Geniposidic acid-100 µM | 13.44 ± 0.53                  | 16.18                    | 13.00                        | 531/54 (3)                             | 0.0018                                             |        |
| II.                 | Asperuloside-100 µM     | 11.95 ± 0.36                  | 3.27                     | 12.00                        | 513/72 (3)                             | 0.6268                                             |        |
|                     | Chlorogenic acid-100 µM | 12.79 ± 0.44                  | 10.53                    | 13.00                        | 423/112 (3)                            | 0.0331                                             |        |
|                     | Control                 | 20.75 ± 0.52                  | /                        | 19.00                        | 204/36 (2)                             | /                                                  |        |
|                     | EUFE-100 µg/mL          | 23.57 ± 0.64                  | 13.64                    | 22.50                        | 216/24 (2)                             | 0.0091                                             |        |
|                     | <i>skn-</i>             | Control                       | 12.56 ± 0.52             | /                            | 13.00                                  | 200/40 (2)                                         | /      |
|                     | 1(mg570) IV.            | EUFE-100 µg/mL                | 14.44 ± 0.34             | 14.99                        | 15.00                                  | 208/32 (2)                                         | 0.0010 |
| II.                 | <i>age-1(hx546)</i>     | Control                       | 19.20 ± 0.85             | /                            | 19.00                                  | 220/20 (2)                                         | /      |
|                     | EUFE-100 mg/mL          | 21.74 ± 0.86                  | 13.23                    | 21.50                        | 200/40 (2)                             | 0.0008                                             |        |
| III.                | <i>clk-1(qm30)</i>      | Control                       | 19.29 ± 0.53             | /                            | 19.00                                  | 220/20 (2)                                         | /      |
|                     | EUFE-100 mg/mL          | 21.47 ± 0.28                  | 11.27                    | 22.50                        | 232/8 (2)                              | 0.0016                                             |        |
| N2                  | Control                 | 15.65 ± 0.52                  | /                        | 16.00                        | 486/54 (3)                             | /                                                  |        |
|                     | Aucubin-100 µM          | 17.91 ± 0.45                  | 14.44                    | 18.00                        | 486/54 (3)                             | <0.0001                                            |        |
|                     | Geniposide-100 µM       | 17.31 ± 0.25                  | 10.62                    | 17.00                        | 522/18 (3)                             | 0.0005                                             |        |
|                     | Geniposidic acid-100 µM | 18.30 ± 0.31                  | 16.97                    | 19.00                        | 504/36 (3)                             | <0.0001                                            |        |
|                     | Asperuloside-100 µM     | 18.69 ± 0.47                  | 19.44                    | 19.00                        | 495/45 (3)                             | <0.0001                                            |        |
|                     | Chlorogenic acid-100 µM | 16.77 ± 0.20                  | 7.19                     | 17.00                        | 477/63 (3)                             | 0.0177                                             |        |

<sup>a</sup> The vehicle control used is sterile water. N2 means *C. elegans* Bristol N2 strain wild-type nematodes. *P* values represent comparison with vehicle calculated using log-rank (Mantel-Cox) test by GraphPad Prism.

**eTable 8. Determination of total phenolic, flavonoid, and terpenoid contents in 12 edible flowers with lifespan-promoting effects.**

| Flower species <sup>a</sup>      | total phenolic<br>(mg chlorogenic<br>acid equivalent<br>(CAE) /g DW) | total flavonoid<br>(mg rutin<br>equivalent (RE) /g<br>DW) | total terpenoid<br>(mg linalool<br>equivalent (LE) /g<br>DW) |
|----------------------------------|----------------------------------------------------------------------|-----------------------------------------------------------|--------------------------------------------------------------|
| 1 <i>H. sabdariffa</i> flower    | 10.16 ± 0.68                                                         | 2.83 ± 0.12                                               | 4.52 ± 0.14                                                  |
| 2 <i>E. ulmoides</i> male flower | 19.91 ± 0.99                                                         | 8.60 ± 0.19                                               | 16.43 ± 0.17                                                 |
| 3 <i>C. tinctorius</i> flower    | 23.94 ± 1.54                                                         | 4.12 ± 0.18                                               | 20.36 ± 0.42                                                 |
| 4 <i>E. breviscapus</i> flower   | 24.55 ± 0.66                                                         | 15.42 ± 0.16                                              | 16.87 ± 0.18                                                 |
| 5 <i>C. aurantium</i> flower     | 26.50 ± 0.72                                                         | 4.00 ± 0.10                                               | 12.87 ± 0.11                                                 |
| 6 <i>D. candidum</i> flower      | 7.80 ± 0.33                                                          | 3.89 ± 0.13                                               | 12.35 ± 0.17                                                 |
| 7 <i>L. japonica</i> flower      | 26.59 ± 0.46                                                         | 32.18 ± 0.11                                              | 10.24 ± 0.13                                                 |
| 8 <i>T. erecta</i> flower        | 35.37 ± 0.51                                                         | 10.91 ± 0.16                                              | 6.85 ± 0.40                                                  |
| 9 <i>N. nucifera</i> flower      | 37.68 ± 0.61                                                         | 15.00 ± 0.15                                              | 10.69 ± 0.11                                                 |
| 10 <i>E. japonica</i> flower     | 7.38 ± 0.22                                                          | 6.72 ± 0.11                                               | 4.89 ± 0.13                                                  |
| 11 <i>T. chinensis</i> flower    | 25.28 ± 0.49                                                         | 19.35 ± 0.16                                              | 4.50 ± 0.09                                                  |
| 12 <i>N. tetragona</i> flower    | 74.26 ± 1.53                                                         | 12.81 ± 0.15                                              | 2.91 ± 0.18                                                  |

<sup>a</sup> Flowers are abbreviated and numbered according to **eTable 1**. Values are expressed as mg of equivalent per gram of dry flower.

**eTable 9. Correlations between 12 edible flowers' total phenolic, flavonoid, and terpenoid contents and effects on nematode mean lifespan.**

|                 | mean lifespan | total phenolic | total flavonoid | total terpenoid |
|-----------------|---------------|----------------|-----------------|-----------------|
| mean lifespan   | 1             | /              | /               | /               |
| total phenolic  | -0.46         | 1              | /               | /               |
| total flavonoid | -0.32         | 0.30           | 1               | /               |
| total terpenoid | 0.64*         | -0.26          | -0.15           | 1               |

\*Correlation is significant at the 0.05 level.

**eTable 10. Chemical constituents qualitatively identified from EUFE by UHPLC-QE-MS.**

| No. | t <sub>R</sub><br>(min) | Chemical<br>formula                             | Ion<br>mode        | Theoretical<br>Mass (Da) | Real Mass<br>(Da) | Mass<br>Errors<br>(mmu) | MS <sup>E</sup> fragmentation (m/z)                       | Relative<br>abundance | Possible<br>compounds          | Sources and<br>references |
|-----|-------------------------|-------------------------------------------------|--------------------|--------------------------|-------------------|-------------------------|-----------------------------------------------------------|-----------------------|--------------------------------|---------------------------|
| 1   | 1.26                    | C <sub>15</sub> H <sub>26</sub> O <sub>9</sub>  | [M-H] <sup>-</sup> | 349.1504                 | 349.1504          | 0                       | 349.1395/187.0915/161.0396/89<br>.0255/71.0138/59.0132    | 2.17E8                | Eucommioside                   | mzCloud, (1)              |
| 2   | 1.56                    | C <sub>16</sub> H <sub>22</sub> O <sub>11</sub> | [M-H] <sup>-</sup> | 389.1089                 | 389.1095          | 0.6                     | 389.0971/227.0477/209.0375/18<br>3.0587/165.0486/147.0384 | 5.31E8                | Deacetylasperul<br>osidic acid | mzCloud, (1)              |
| 3   | 1.58                    | C <sub>17</sub> H <sub>26</sub> O <sub>11</sub> | [M-H] <sup>-</sup> | 405.1402                 | 405.1406          | 0.4                     | 405.1413/315.1096/243.0900/22<br>5.0798/144.0237          | 3.91E8                | 8-O-<br>Acetylharpagide        | mzCloud, (1)              |
| 4   | 1.62                    | C <sub>15</sub> H <sub>22</sub> O <sub>9</sub>  | [M-H] <sup>-</sup> | 345.1191                 | 345.1189          | -0.2                    | 299.0677/183.0588/165.0486/13<br>7.0180                   | 3.48E8                | Aucubin                        | mzCloud, (1)              |
| 5   | 1.97                    | C <sub>16</sub> H <sub>22</sub> O <sub>10</sub> | [M-H] <sup>-</sup> | 373.1140                 | 373.1144          | 0.4                     | 373.1023/211.0530/123.0390/71<br>.0138                    | 1.80E9                | Geniposidic acid               | mzCloud, (1)              |
|     | 1.99                    |                                                 | [M+H] <sup>+</sup> | 375.1286                 | 375.1278          | -0.8                    | 195.0652/177.0545/149.0597/12<br>1.0650/93.0704           | 1.44E9                |                                |                           |
| 6   | 1.98                    | C <sub>11</sub> H <sub>14</sub> O <sub>5</sub>  | [M-H] <sup>-</sup> | 225.0768                 | 225.0762          | -0.6                    | 225.0802/181.0909/82.0306                                 | 2.18E9                | Genipin                        | mzCloud, (2)              |
| 7   | 2.36                    | C <sub>19</sub> H <sub>26</sub> O <sub>12</sub> | [M-H] <sup>-</sup> | 445.1351                 | 445.1356          | 0.5                     | 445.1219/401.1328/302.1703/16<br>1.0396                   | 2.14E8                | Gaultherin                     | mzCloud, (1)              |
| 8   | 2.54                    | C <sub>18</sub> H <sub>24</sub> O <sub>12</sub> | [M-H] <sup>-</sup> | 431.1195                 | 431.1197          | 0.2                     | 431.1061/269.0579/251.0474/22<br>5.0686/59.0132           | 2.28E8                | Asperulosidic<br>acid          | mzCloud, (1)              |
| 9   | 2.68                    | C <sub>16</sub> H <sub>18</sub> O <sub>9</sub>  | [M-H] <sup>-</sup> | 353.0878                 | 353.0876          | -0.2                    | 353.0768/191.0486                                         | 2.12E8                | Chlorogenic<br>acid            | mzCloud, (1)              |
|     | 2.71                    |                                                 | [M+H] <sup>+</sup> | 355.1024                 | 355.1020          | -0.4                    | 163.0389/135.0441/89.0391                                 | 5.04E8                |                                |                           |
| 10  | 3.01                    | C <sub>18</sub> H <sub>22</sub> O <sub>11</sub> | [M-H] <sup>-</sup> | 413.1089                 | 413.1089          | 0                       | 413.0974/191.0274/147.0386                                | 1.61E9                | Asperuloside                   | mzCloud, (1)              |
|     | 3.03                    |                                                 | [M+H] <sup>+</sup> | 415.1235                 | 415.1219          | -1.6                    | 253.0707/193.0497/175.0391/14<br>7.0441/119.0494/91.0548  | 5.52E8                |                                |                           |

| No. | t <sub>R</sub><br>(min) | Chemical<br>formula                             | Ion<br>mode         | Theoretical<br>Mass (Da) | Real Mass<br>(Da) | Mass<br>Errors<br>(mmu) | MS <sup>E</sup> fragmentation (m/z)                       | Relative<br>abundan<br>ce | Possible<br>compounds                         | Sources and<br>references |
|-----|-------------------------|-------------------------------------------------|---------------------|--------------------------|-------------------|-------------------------|-----------------------------------------------------------|---------------------------|-----------------------------------------------|---------------------------|
| 11  | 3.15                    | C <sub>16</sub> H <sub>18</sub> O <sub>9</sub>  | [M-H] <sup>-</sup>  | 353.0878                 | 353.0879          | 0.1                     | 353.0765/191.0485/85.0246                                 | 1.99E8                    | Cryptochlorogen<br>ic acid                    | mzCloud, (1)              |
|     | 3.18                    |                                                 | [M+H] <sup>+</sup>  | 355.1024                 | 355.1020          | -0.4                    | 355.1707/163.0389/135.0441/89<br>.0392                    | 1.97E8                    |                                               |                           |
| 12  | 3.33                    | C <sub>15</sub> H <sub>10</sub> O <sub>7</sub>  | [M+H] <sup>+</sup>  | 303.0499                 | 303.0494          | -0.5                    | 303.0495/229.0494/153.0181/13<br>7.0233                   | 7.61E8                    | Quercetin                                     | mzCloud, (1)              |
| 13  | 3.51                    | C <sub>26</sub> H <sub>28</sub> O <sub>16</sub> | [M-H] <sup>-</sup>  | 595.1305                 | 595.1313          | 0.8                     | 595.1305/300.0274/271.0249/25<br>5.0299/243.0297          | 9.60E8                    | Peltatoside                                   | mzCloud                   |
|     |                         |                                                 | [M+H] <sup>+</sup>  | 597.1450                 | 597.1447          | -0.3                    | 303.0496/229.0493/153.0181/85<br>.0290                    | 5.65E8                    |                                               |                           |
| 14  | 3.54                    | C <sub>17</sub> H <sub>24</sub> O <sub>10</sub> | [M+Na] <sup>+</sup> | 411.1262                 | 411.1251          | -1.1                    | 411.1257/249.0732/217.0468/20<br>3.0529                   | 7.40E8                    | Geniposide                                    | mzCloud, (3)              |
| 15  | 3.58                    | C <sub>27</sub> H <sub>30</sub> O <sub>16</sub> | [M-H] <sup>-</sup>  | 609.1461                 | 609.1456          | -0.5                    | 609.1461/300.0274/271.0249/25<br>5.0299/243.0297          | 1.16E9                    | Rutin                                         | mzCloud, (1)              |
| 16  | 3.60                    | C <sub>21</sub> H <sub>20</sub> O <sub>11</sub> | [M+H] <sup>+</sup>  | 449.1078                 | 449.1071          | -0.7                    | 449.1098/303.0497/287.0548/15<br>3.0180/85.0290           | 5.50E8                    | Astragalin/Kaem<br>pferol 3-O-<br>glucoside   | mzCloud, (1)              |
| 17  | 3.87                    | C <sub>15</sub> H <sub>10</sub> O <sub>6</sub>  | [M+H] <sup>+</sup>  | 287.0550                 | 287.0546          | -0.4                    | 287.0547/153.0182/121.0286                                | 4.49E8                    | Kaempferol                                    | mzCloud, (1)              |
| 18  | 3.92                    | C <sub>16</sub> H <sub>12</sub> O <sub>7</sub>  | [M+H] <sup>+</sup>  | 317.0656                 | 317.0650          | -0.6                    | 317.0653/302.0418/285.0389/15<br>3.0182                   | 4.76E8                    | Isorhamnetin                                  | mzCloud                   |
| 19  | 3.94                    | C <sub>28</sub> H <sub>32</sub> O <sub>16</sub> | [M-H] <sup>-</sup>  | 623.1618                 | 623.1615          | -0.3                    | 623.1621/314.0432/299.0197/27<br>1.0250/243.0297/151.0025 | 6.72E8                    | Isorhamnetin 3-<br>O-<br>neohesperidosid<br>e | mzCloud                   |
|     |                         |                                                 | [M+H] <sup>+</sup>  | 625.1763                 | 625.1748          | -1.5                    | 317.0654/302.0419/153.0182/85<br>.0290                    | 3.49E8                    |                                               |                           |



| No. | t <sub>R</sub><br>(min) | Chemical<br>formula                             | Ion<br>mode        | Theoretical<br>Mass (Da) | Real Mass<br>(Da) | Mass<br>Errors<br>(mmu) | MS <sup>E</sup> fragmentation (m/z)                      | Relative<br>abundan<br>ce | Possible<br>compounds                        | Sources and<br>references |
|-----|-------------------------|-------------------------------------------------|--------------------|--------------------------|-------------------|-------------------------|----------------------------------------------------------|---------------------------|----------------------------------------------|---------------------------|
| 20  | 4.03                    | C <sub>15</sub> H <sub>12</sub> O <sub>6</sub>  | [M-H] <sup>-</sup> | 287.0561                 | 287.0562          | 0.1                     | 287.0460/150.9968/135.0385/10<br>7.0164/65.0029          | 1.25E8                    | Eriodictyol                                  | mzCloud                   |
| 21  | 4.08                    | C <sub>27</sub> H <sub>30</sub> O <sub>15</sub> | [M-H] <sup>-</sup> | 593.1512                 | 593.1512          | 0                       | 593.1514/285.0405/255.0299/22<br>7.0346                  | 1.79E8                    | Kaempferol-3-<br>O-rutinoside                | mzCloud, (1)              |
|     |                         |                                                 | [M+H] <sup>+</sup> | 595.1657                 | 595.1649          | -0.8                    | 287.0548/85.0290/71.0498                                 | 1.59E8                    |                                              |                           |
| 22  | 4.27                    | C <sub>21</sub> H <sub>20</sub> O <sub>11</sub> | [M+H] <sup>+</sup> | 449.1078                 | 449.1071          | -0.7                    | 287.0548/153.0182                                        | 3.20E8                    | Kaempferol-7-<br>O-glucoside                 | mzCloud                   |
| 23  | 4.55                    | C <sub>23</sub> H <sub>22</sub> O <sub>12</sub> | [M+H] <sup>+</sup> | 491.1184                 | 491.1178          | -0.6                    | 287.0548/187.0601/153.0182/10<br>9.0288                  | 2.04E8                    | 6"-O-<br>Acetylastragalin                    | mzCloud, (1)              |
| 24  | 4.67                    | C <sub>15</sub> H <sub>10</sub> O <sub>5</sub>  | [M-H] <sup>-</sup> | 269.0455                 | 269.0459          | 0.4                     | 269.0368/225.1416/150.9975/13<br>7.0909/117.0289/85.0304 | 1.67E8                    | Apigenin                                     | mzCloud                   |
| 25  | 4.90                    | C <sub>21</sub> H <sub>20</sub> O <sub>12</sub> | [M-H] <sup>-</sup> | 463.0882                 | 463.0881          | -0.1                    | 463.0889/300.0274/271.0249/25<br>5.0299/151.0025         | 1.17E9                    | Quercetin-3β-D<br>glucoside/isoqu<br>ercetin | mzCloud, (1)              |
|     | 4.91                    |                                                 | [M+H] <sup>+</sup> | 465.1028                 | 465.1020          | -0.8                    | 303.0497/229.0495/153.0181/85<br>.0290                   | 3.04E8                    |                                              |                           |
| 26  | 4.95                    | C <sub>15</sub> H <sub>12</sub> O <sub>5</sub>  | [M-H] <sup>-</sup> | 271.0612                 | 271.0613          | 0.1                     | 271.0519/177.0118/165.0124/11<br>9.0441/107.0164         | 4.43E8                    | Naringenin                                   | mzCloud, (1)              |
| 27  | 5.03                    | C <sub>15</sub> H <sub>12</sub> O <sub>5</sub>  | [M-H] <sup>-</sup> | 271.0612                 | 271.0613          | 0.1                     | 271.0520/150.9968/119.0441/10<br>7.0164                  | 1.12E8                    | Naringeninchal<br>cone                       | mzCloud                   |
| 28  | 5.28                    | C <sub>9</sub> H <sub>16</sub> O <sub>4</sub>   | [M-H] <sup>-</sup> | 187.0976                 | 187.0967          | -0.9                    | 187.0900/168.9837/125.0912                               | 6.79E7                    | Eucommiol                                    | mzCloud, (1)              |

## **eMethod 1. The specific preparation process of floral ethanolic extracts and EUFE.**

After drying, removing the inedible parts, and grinding, floral powders were extracted. All extractions were performed in triplicates and stored at  $-80^{\circ}\text{C}$ . Each sample (1.0 g) was weighed and extracted thrice with 80% aqueous ethanol solution (1:10, w/v) via the ultrasonic-assisted procedure ( $40^{\circ}\text{C}$ , 500 w, 1 h). After centrifugation, the supernatants were pooled, combined, and blown by a nitrogen stream to remove ethanol. The remaining solution was re-dissolved using ultrapure water to 20 mL and filtered by a 0.22  $\mu\text{m}$  filter membrane. The concentration of the resulting solution was 50 mg dry flower equivalents per millilitre (50 mg/mL). Since ethanol might have a relatively small residual effect, we used the vehicle solution based on a sham ethanol extraction experiment. For EUFE, we adopted the similar extraction method but more male flowers were used, ethanol solvent was removed with the rotatory evaporator and obtained extracts were lyophilized. The extract solution concentrations were presented in  $\mu\text{g}$  EUFE/mL.

## **eMethod 2. The specific process of synchronization and administration in *C.elegans*.**

Synchronization: the young adult worms with intensive eggs were cleaned and collected by M9 buffer, then lysed with alkaline lysate for 5 min. The alkaline lysate consists of 50% 10-fold dilutions of sodium hypochlorite solution (NaOCl, 6~14% active chlorine basis, Macklin) and 50% 1 M sodium hydroxide solution. After centrifugation and washing 2~3 times with M9 to remove the lysis solution, their eggs were transferred into blank NGM plates and developed into L1 or L4 larvae at  $20^{\circ}\text{C}$ .

Administration: after 20 min under UV exposure, 60 mm NGM-plates with sufficient food were followed by the addition of the corresponding concentration of vehicle or sample solution (150  $\mu\text{L}$ ) on the surface and placed at  $4^{\circ}\text{C}$  for storage after air-drying on super-clean table.

## **eMethod 3. The detailed calculation of the antioxidant potency composite index (APCI).**

The antioxidant potency composite index (APCI) was calculated according to the following formula:

$$\text{APCI} = \frac{\text{DPPH}_{\text{index}} + \text{ABTS}_{\text{index}} + \text{FRAP}_{\text{index}}}{3}$$

Taking  $\text{DPPH}_{\text{index}}$  as an example, the calculation method was as follows :

$$\text{DPPH}_{\text{index}} = \frac{\text{DPPH value of sample}}{\text{DPPH maximum value of among 30 kinds of floral extracts}} \times 100$$

The calculation method of  $\text{ABTS}_{\text{index}}$  and  $\text{FRAP}_{\text{index}}$  was similar. According to the above, 30 edible floral extracts 'APCI were summarised in **eTable 5**.

## **eMethod 4. The detailed procedures of diet preference assay.**

100  $\mu\text{L}$  OP50 solution was added on the two sides of an NGM plate (10 cm in diameter). After the solution was air-dried, the vehicle or EUFE was covered on top of the lawn. After dried, a drop of M9 buffer that collected 80 L1-staged worms was plated in the middle of the plate, as shown in **eFigure 1A**. The worms located in either lawn were individually counted after 8 h at  $20^{\circ}\text{C}$ .

## **eMethod 5. The detailed procedures of microscopic fluorescence imaging.**

Differently treated worms were anesthetized by using the M9 buffer with 5 mM levamisole and placed

at 1% agarose pads on thin glass slides. Under nonsaturating exposure conditions, the images were captured by using the Zeiss LSM 880 confocal microscope equipped with 10x air, 40x water- and 63x oil-immersion objectives (Carl Zeiss Inc., Germany).

**Preparation of slides carrying samples.** The slides (50 mm × 24 mm × 0.15 mm) were immersed in 1% agarose TAE Buffer that had warmed to clarity and quickly withdrawn to place on a clean plane for cooling. Then we used the blade to retain the agarose pad for one side on the middle part of the slides. The agarose pad was about 0.1~0.2 mm in thickness. M9 buffer with different anesthetized nematode strains (each at least 20 worms, using 5 mM levamisole hydrochloride to anesthetize) was dropped on the above pad and covered with a circular cover glass (13 mm diameter) for microscopic observation. Air bubbles should be avoided.

**Muscle and mitochondrial morphologies.** Since muscle and mitochondrial morphology cannot be well quantified, we emphasized the single-blindness of image capture, i.e., related photographers were not aware of the specific group settings. Both observations with the GFP channel, i.e., the excitation and emission wavelengths were 488 nm and 510~540 nm. For muscle fiber observation, we used the 40x water-immersion objective. Laser intensity was 5.0% for GFP imaging with a master gain of 630. An 8-bit digitization depth was used to acquire images, with constant detector offsets and master gain. Worms were pre-treated with vehicle or 100 µg/mL EUFE for 1 and 5 d, and the photos of the head, midbody, and tail were taken respectively. For mitochondrial observation, treatment duration was 1 and 3 days. The other differences were that we used the 63x oil-immersion objective and set the master gain was 480. All the snapshots were taken from the same part of *C. elegans*: muscles from the upper part of the worm, excluding the regions of the esophagus and vulva.

**Lipofuscin level.** The wild-type worms were treated with vehicle or EUFE for 1, 5, and 9 d and their lipofuscin autofluorescence was detected using 488 nm ex / 500~560 nm em wavelengths. Except for the 10x air-immersion objective, other acquisition conditions were the same as in muscle fiber observation. And changes in nematode body size on 5 and 9 days resulted in different scale bars for the corresponding stitched images. Image quantification of fluorescence intensity was done densitometrically by tracing around each animal's intestine and determining mean pixel intensity using the Fiji software (<https://imagej.net/Fiji/Downloads>).

**Intracellular localization of DAF-16.** To investigate the effect of EUFE on the intracellular distribution of DAF-16, the TJ356 strain was selected. In this strain, the DAF-16 gene and the gene coding for the GFP have been fused. The intracellular distribution of DAF-16::GFP was assessed as 'cytosolic', 'intermediate', and 'nuclear' as shown in **Figure 4A**. Pileup maps represented the percentage in corresponding categories. Under the 10x air-immersion objective, the laser intensity was 10.0% for GFP imaging with a master gain of 630, and 8-bit digitization depth was used. And treatment duration of EUFE was 1 and 3 days.

**Expression of LGG-1.** Three days after the treatment, the DA2123 strain worms were captured for comparison of LGG-1 protein expression between groups. The extent of LGG-1 expression was indicated by counting the numbers of LGG-1::GFP positive puncta regions in the lateral epidermal seam cells of the whole worm. Acquisition conditions were the same as in DAF-16 observation.

**Expression of SOD3.** Three days after the treatment, the CF1553 strain worms were captured for comparison of SOD3 protein expression between groups. Acquisition conditions were the same as in DAF-16 observation. And the expression of SOD3 was compared by the mean relative fluorescence intensity of the pharynx and the tail. The values were measured using the Fiji software by selecting a region of interest (ROI).

**Mitophagy detection.** DsRed was excited with a 561 nm laser (650 nm emission filter). Treatment duration was one day for the vehicle, EUFE, and the positive control CCCP (a mitophagy inducer). Under the 63x oil-immersion objective, the laser intensity was 5.0% for GFP imaging with a master gain of 630 and 60.0% for DsRed imaging with a master gain of 650. Digitization depth of 8 bits was used for acquiring images, while detector offset and master gain were kept constant. All the snapshots were taken from the same part of *C. elegans*: muscles from the mid-body of the worm, excluding the regions of the esophagus and vulva. Colocalization analysis was performed by using the Colocalization Plugin integrated into the Fiji software.

### **eMethod 6. The detailed procedures of transmission electron microscopy.**

Worms were fixed using 2.5% glutaraldehyde overnight (0.1 M, pH 7.4 phosphate buffer). After fixation, samples were rinsed with the buffer, post-fixed with 1% osmium tetroxide for 1-2 hours, rinsed again with the buffer, dehydrated by an ethanol series and acetone, infiltrated in a mixture of acetone and Spurr embedding agent, and embedded in 100% Spurr overnight and cured at 70°C for 36 h. Ultrathin sections (70~90 nm) were taken with the ultramicrotome Leica EM UC7 (Leica Microsystems GmbH, Vienna, Austria) and transferred on 200-mesh copper grids. Grids were stained with lead citrate and uranyl acetate (saturated solution in 50% (v/v) ethanol). Sections were viewed by the Hitachi H-7650 (Hitachi, Tokyo, Japan). Images were obtained from representative sections taken from more than 10 worms in each group.

### **eMethod 7. The specific procedures of qualitative and quantitative analysis of EUFE.**

For qualitative analysis, instrument control, data acquisition or analysis were performed by the Xcalibur software. Moreover, the raw data files were uploaded to Compound Discoverer<sup>TM</sup> and compound identification was achieved by matching with the mzCloud mass spectral library and manual validation. 10 µL of the extract solution were injected into the UHPLC system and chromatographic separation was conducted on a UHPLC BEH C<sub>18</sub> column (2.1× 100 mm, 1.7 µm) (Waters, USA) at 40°C. 0.1% formic acid in water (A) and 0.1% formic acid in acetonitrile (B) were used as aqueous and organic mobile phases, respectively. A gradient elution system was set up as follows: 0~3 min, 5~25% B; 3~4 min, 25~65% B; 4~10 min, 65% B; 10~10.1 min, 65~5% B; 10.1~13 min, 5% B. The flow rate was 0.3 mL/min. The instrument was operated in negative and positive ion modes to achieve full-scan analysis over an m/z range of 100~1000. And the optimized parameters are indicated below: the sheath gas flow rate (40 L/min); aux gas flow rate (10 L/min); spray voltage (3 kV); capillary temperature (320°C); probe heater temperature (350°C); S-lens RF level (50%).

For quantitative analysis, 10 µL of the extract solution was injected into the system and chromatographic separation was conducted on a reverse-phase ODS-2 Hypersil C<sub>18</sub> column (4.6×250 nm, 5 µm) (Thermo Fisher Scientific, USA) at 30°C. The solvents used were 0.5% phosphoric acid aqueous solution (A) and methanol (B). The linear gradient of phase B was 0~30 min, 5~15%; 30~55 min, 15~30% at a flow rate of 1 mL/min.

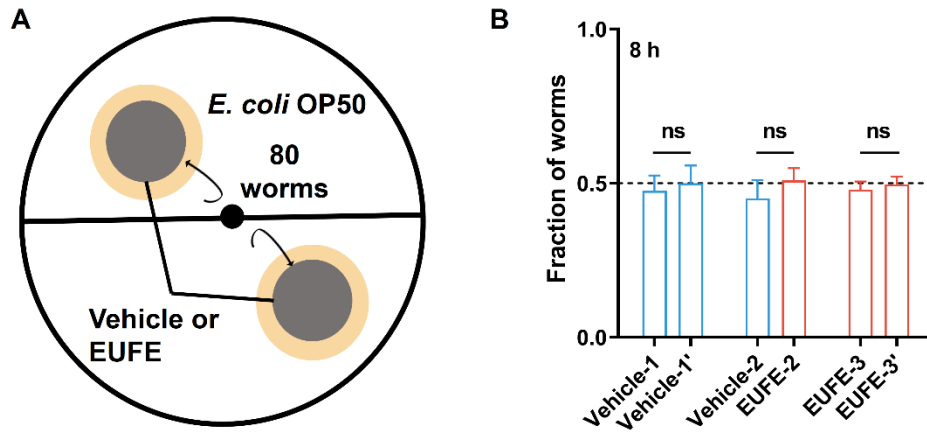

**eFigure 1 The scheme and results of diet preference assay in *C.elegans*.**

(A) Scheme of the nematode dietary preference assay. EUFE or vehicle was placed on the *E. coli* lawn. (B) Dietary preference (for 8 h) of nematodes treated with EUFE and vehicle. For B, treatments with EUFE at a concentration of 100 µg/mL and statistically non-significant at ns  $P > 0.05$  by multiple  $t$ -test. Each experiment was repeated 3 times.

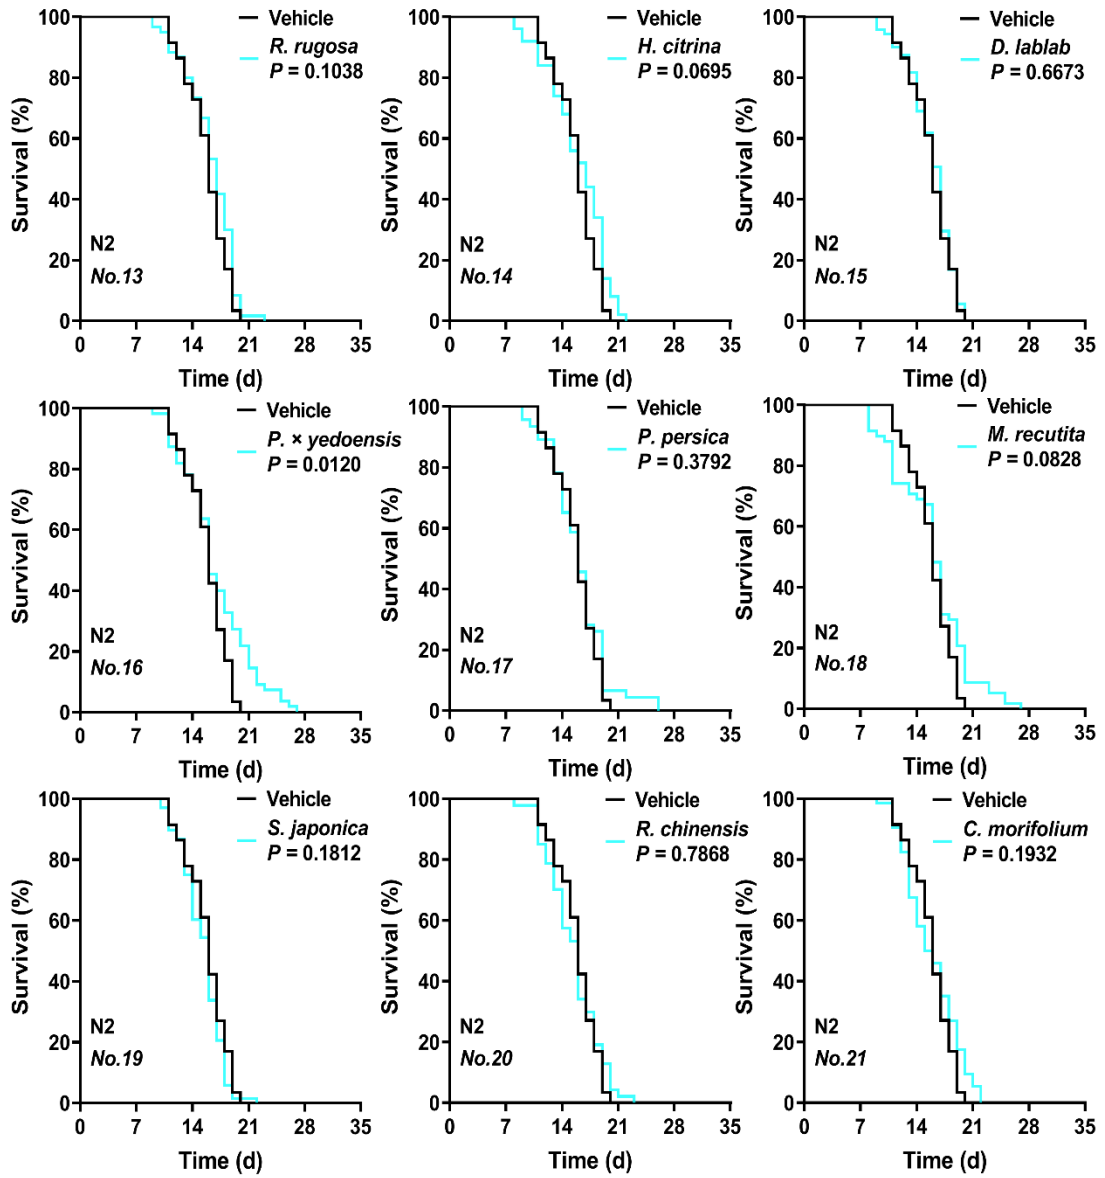

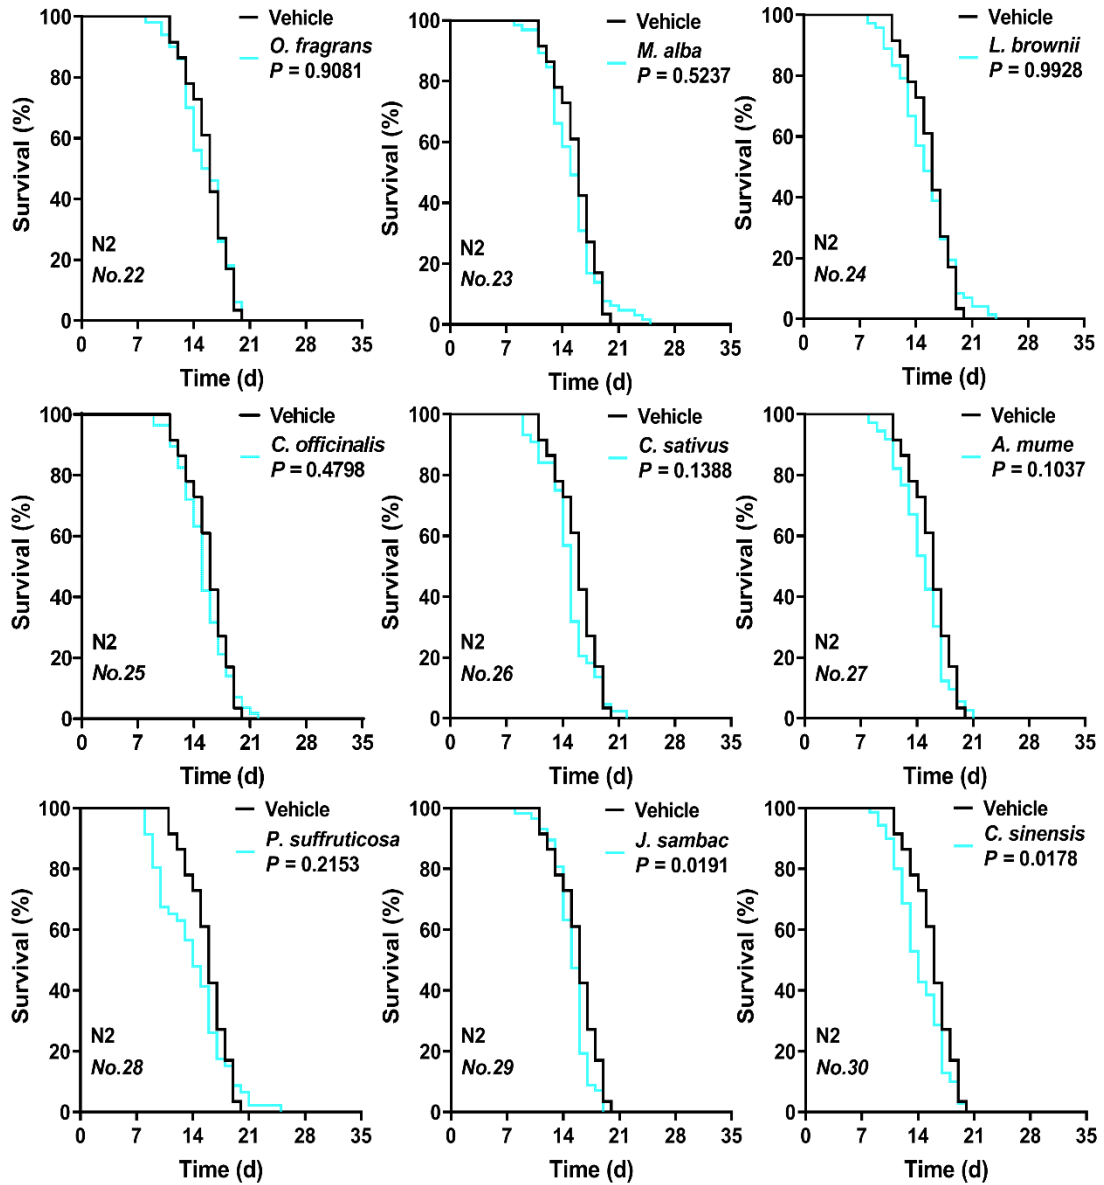

**Figure 2. Effects of ethanolic extracts of 18 edible flowers on *C.elegans* lifespan.** The respective survival curves of nematodes treated with the remaining 18 flowers (non-significant or without longevity-promoting effect) (at 50 mg/mL concentration) or with the vehicle. N2 means *C. elegans* Bristol N2 strain wild-type nematodes. Flowers were abbreviated and numbered according to eTable 1. See eTable 4 for more detailed

information.

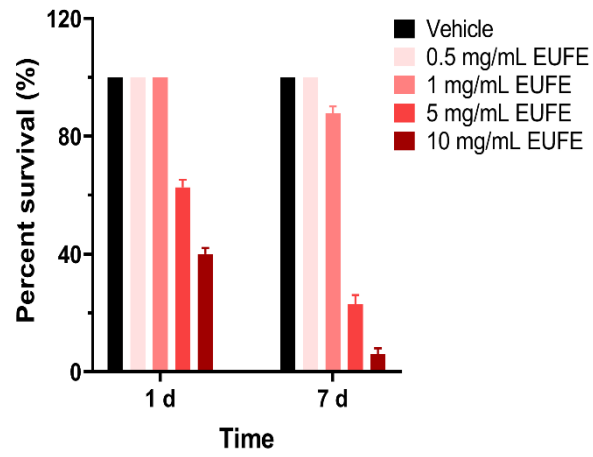

**eFigure 3.** The survival rate of wild-type nematodes cultured on NGM plates containing 0.5, 1, 5, or 10 mg/mL EUFE or vehicle in 1 d and 7 d.



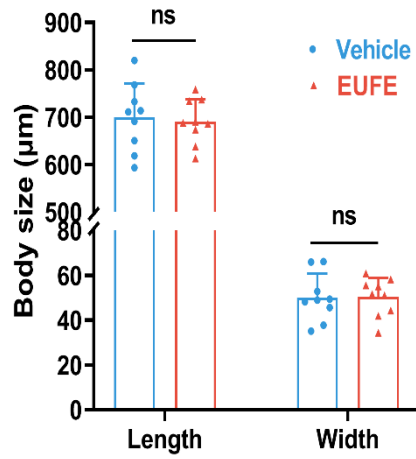

**eFigure 4. The body size (for 1 day) of nematodes treated with EUFE and vehicle.** Treatments with EUFE at a concentration of 100 µg/mL and statistically non-significant at  $ns P > 0.05$  by the unpaired *t*-test. Each experiment was repeated 3 times.

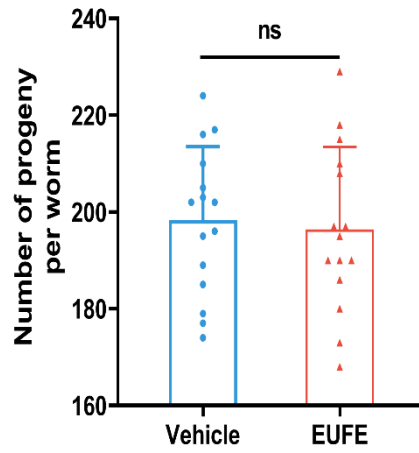

**eFigure 5. The reproductive ability (for whole reproductive stage) of nematodes treated with EUFE and vehicle.** Treatments with EUFE at a concentration of 100  $\mu\text{g/mL}$  and statistically non-significant at  $ns P > 0.05$  by the unpaired t-test. Each experiment was repeated 3 times.

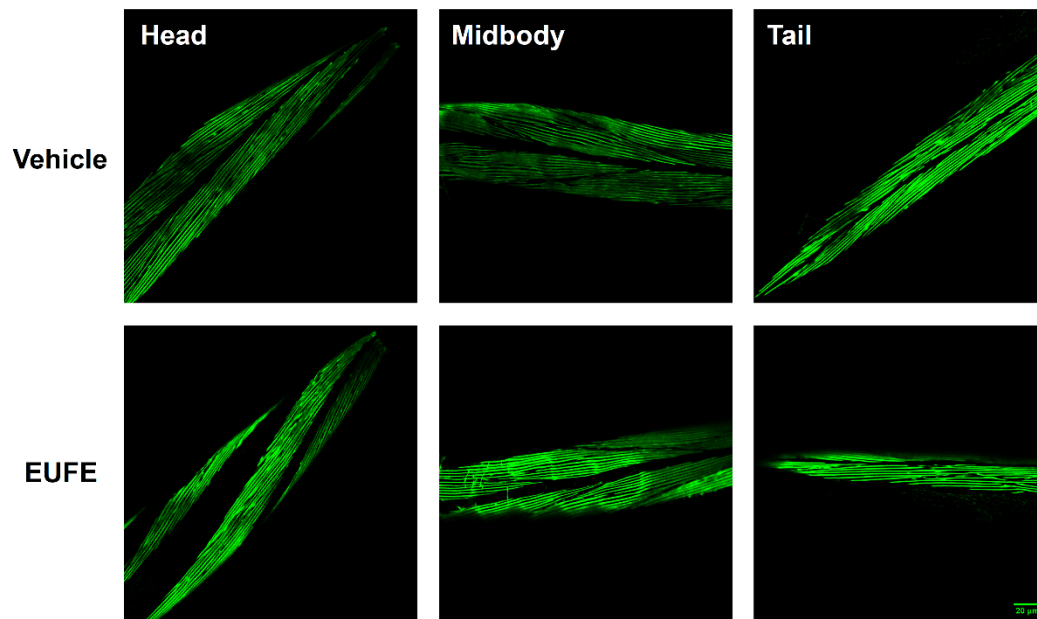

**eFigure 6. Representative images of muscle morphology at days 1 of adulthood of  $p_{myo-3}::MYO-3::GFP$  nematodes treated with EUFE or vehicle.**

Scale bar, 20  $\mu$ m. The captured muscles were located at the head, mid-body, and tail of nematodes. Treatments with EUFE at a concentration of 100  $\mu$ g/mL.

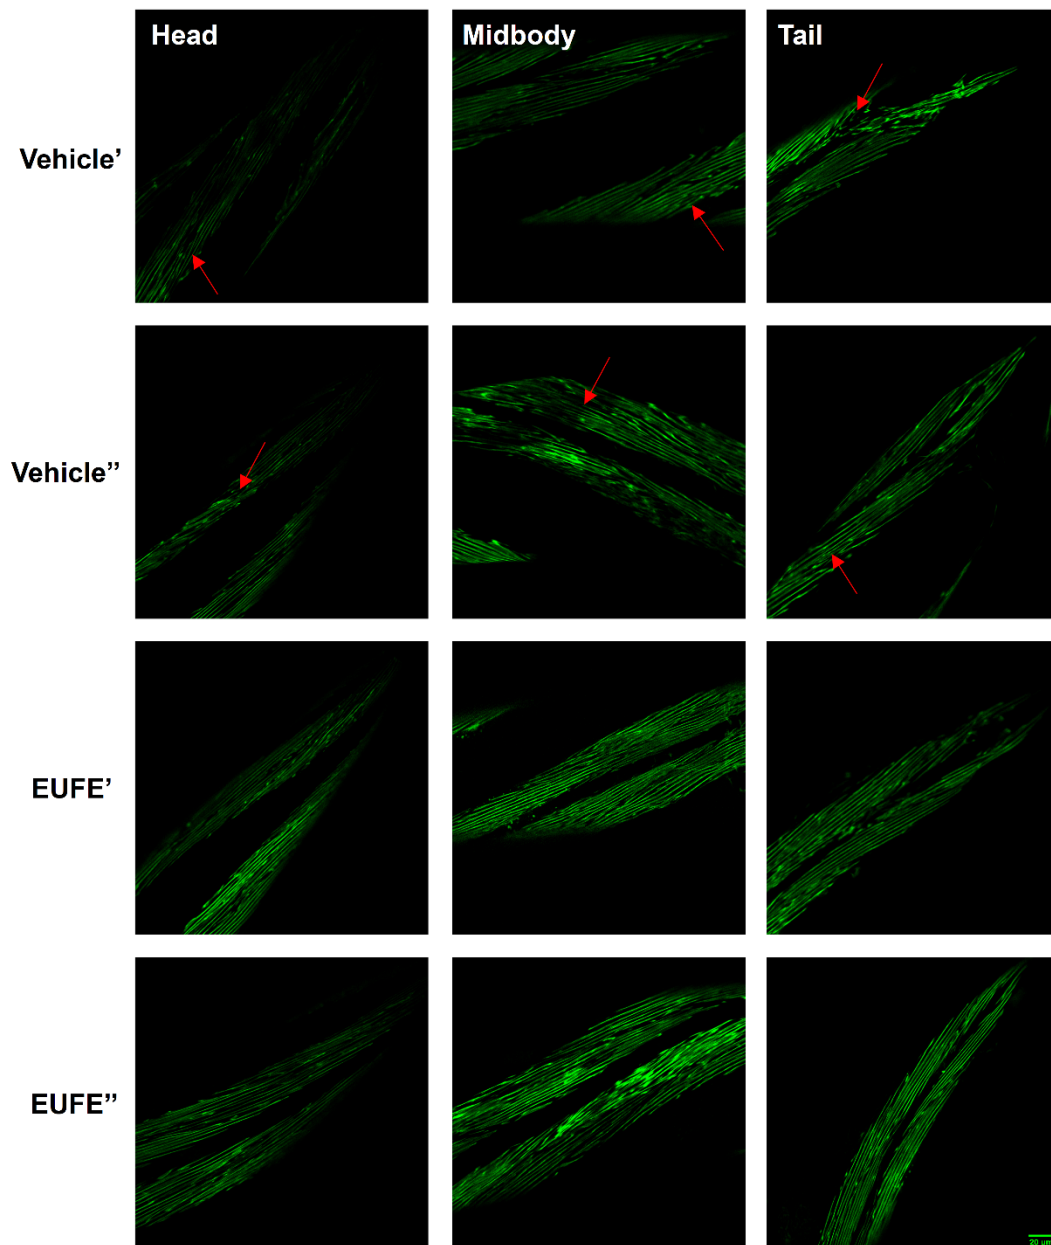

**eFigure 7. Representative images of muscle morphology at days 5 of adulthood of  $p_{myo-3}MYO-3::GFP$  nematodes treated with EUFE or vehicle.**

Scale bar, 20  $\mu m$ . The captured muscles were located at the head, mid-body, and tail of nematodes. Treatments with EUFE at a concentration of 100  $\mu g/mL$ . These images were parallel repeats of Figure 2G.

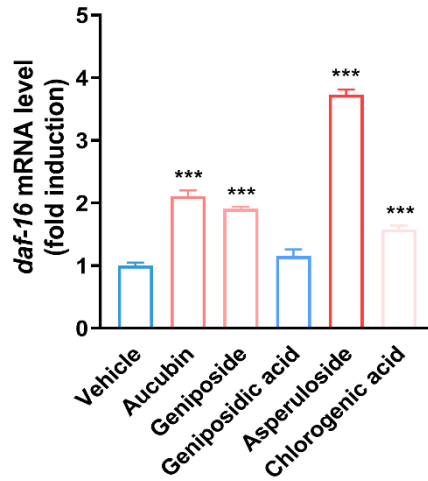

**eFigure 8. Relative mRNA expression of *daf-16* gene in worms after treatment of vehicle or five identified compounds for 1 d.** The concentration of each compound was 100  $\mu$ M. *act-1* mRNA as the loading control. Statistically significant at \*\*\*  $P < 0.001$  by unpaired *t*-test.

Each experiment was repeated 3 times.

## Reference

1. Yan Y, Zhao H, Liu X, Chai C, Wang S, Hua Y. Analysis of chemical constituents in male flowers of *Eucommia ulmoides* by liquid chromatography coupled with electrospray ionization-triple quadrupole-time of flight-tandem mass spectrometry (LC-ESI-Triple TOF-MS/MS). *Food Science*. 2018;39(06):215-221. doi: 10.7506/spkx1002-6630-201806034
2. Liu K, Wang J, Wei L, Pan Y, Yuan Y. Determination of eight constituents in the bark, leaves and male flowers of *Eucommia ulmoides* by HPLC. *Chinese Traditional Patent Medicine*. 2021;43(3):686-691. doi: 10.3969/j.issn.1001-1528.2021.03.023
3. Ding Y, Zhang T, Tao J, Guo C, Jin M, Ji G. Determination of geniposide in rat plasma by UPLC-MS. *Asian Journal of Chemistry*. 2013;25(7):3644-3650. doi: 10.14233/ajchem.2013.13691
